# Supplementary figures and images for: In situ magnetic resonance imaging of electrically-induced water diffusion in a Nafion ionic polymer filmElectronic supplementary information (ESI) available: structure of Na-exchanged Nafion and schematic description of actuation mechanism of an electro-active polymer actuator device. See http://www.rsc.org/suppdata/cc/b3/b301039b/
Source: Royal Society of Chemistry journal article supplement (doi:10.1039/b301039b), 2003-03-18

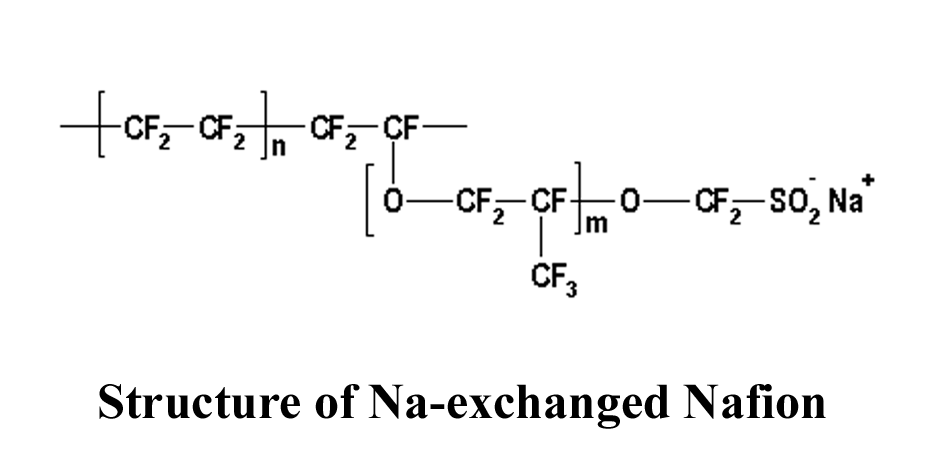


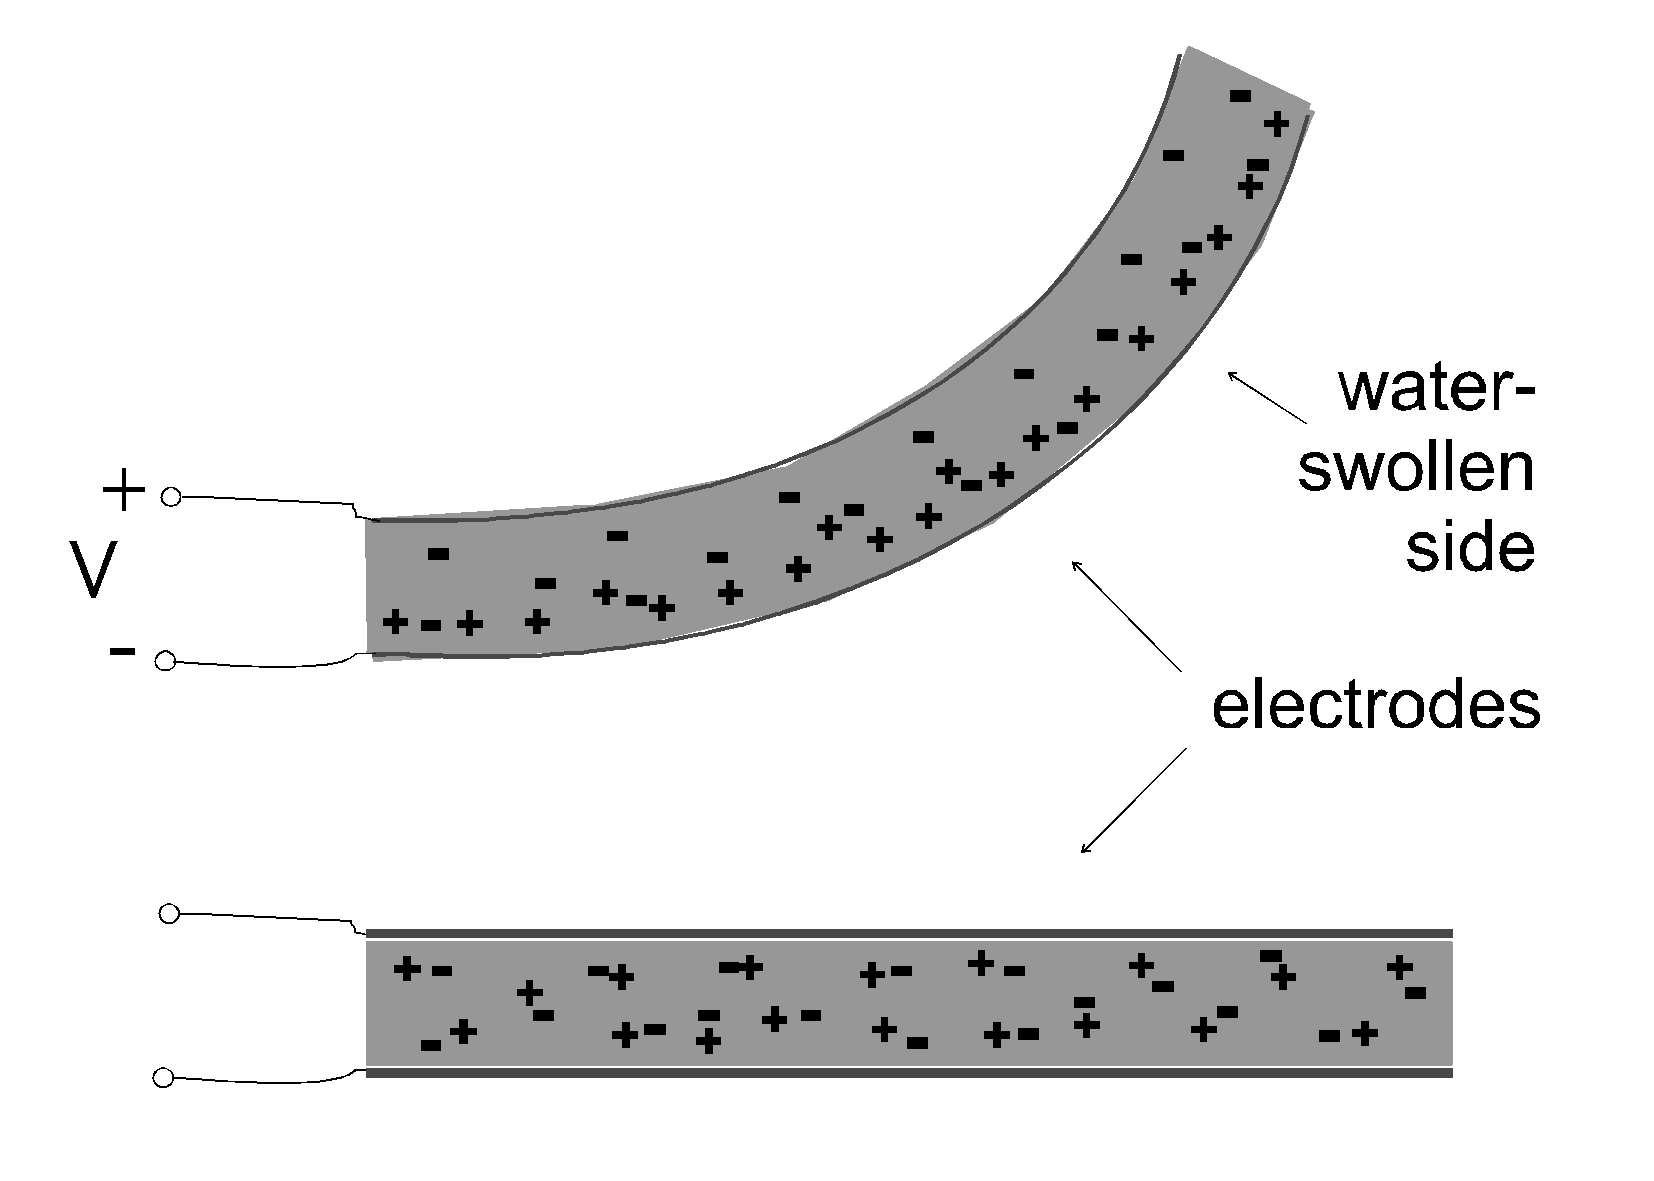


Schematic description of actuation mechanism of an Electro-Active Polymer actuator device

Supplement: b301039b.doc [file b301039b.doc]
